# Supplementary material for: Lessons From the COVID-19 Pandemic on the Nature of Work Among Those With Mental Illness
Source: Atypon-hosted journal article supplement (doi:10.1176/appi.ps.202100217), 2021-08-09
Supplement: appi.ps.202100217.ds001.pdf [file appi.ps.202100217.ds001.pdf]

Employment in Industry and Occupation Categories, by Level of Psychological Distress (Ages 18-64), by Respondent Race, National Health Interview Survey (2016-2018)

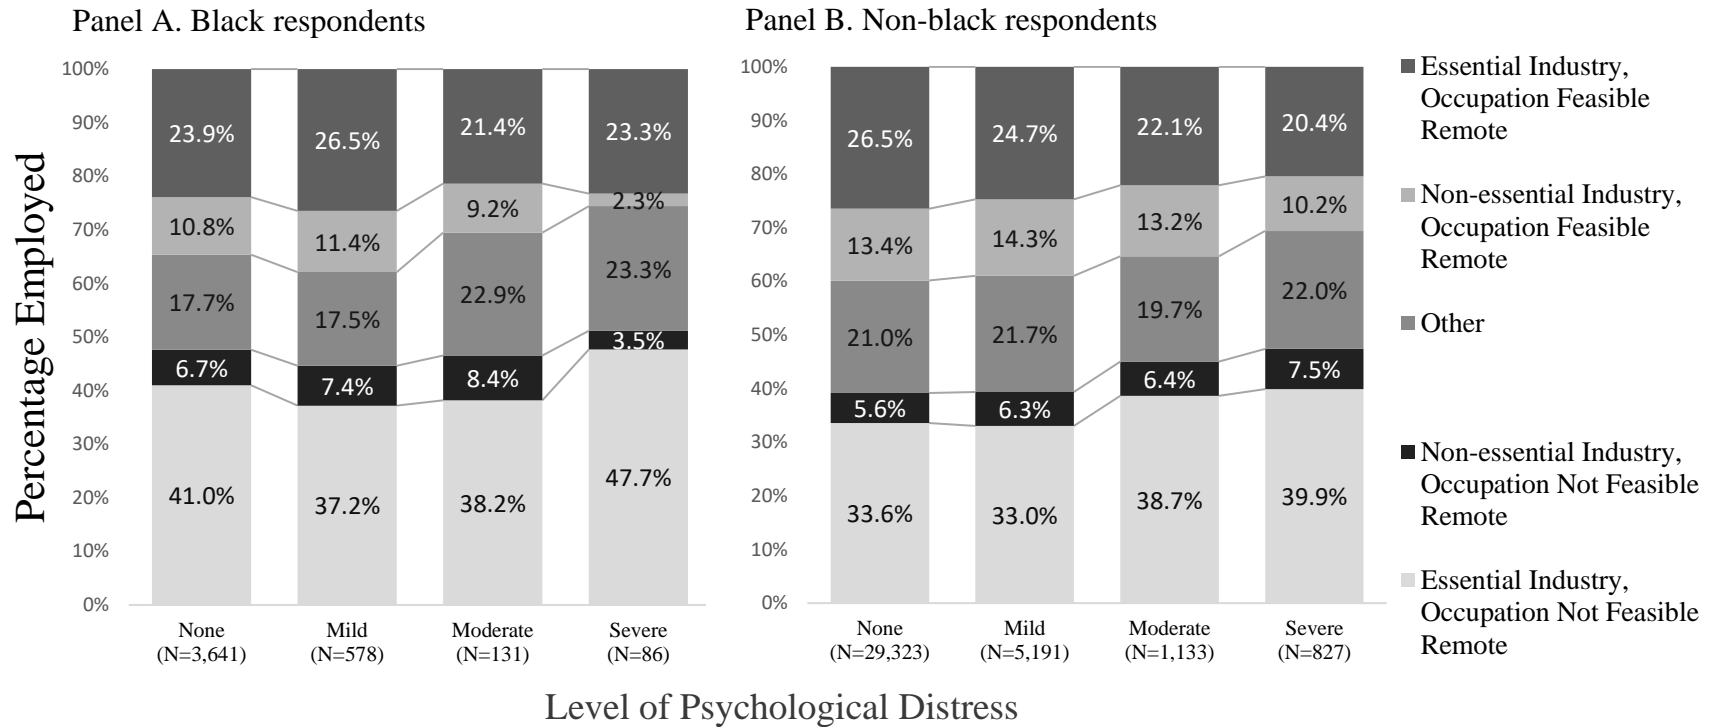

Note: Figure is based on 40,910 survey respondents from 2016-2018 pooled NHIS data. 121 survey respondents are dropped from our sample because information on race is not released. Non-Black respondents include those who identified themselves as White, American Indian/Alaskan Native, Asian, or Mixed Race. The occupation category of “Other” includes those whose essential industry status and feasibility for remote work are categorized as “undetermined.”
